# Supplementary material for: Discriminating the origin of calcium oxalate monohydrate formation in kidney stones via synchrotron microdiffraction
Source: Royal Society of Chemistry journal article supplement (doi:10.1039/d1an01703a), 2021-12-06
Supplement: d1an01703a1.pdf [file d1an01703a1.pdf]

## **Support Information of the manuscript: “Discriminating the formation origin of calcium oxalate monohydrate in kidney stones via synchrotron microdiffraction”**

**Authors: Iris H.Valido<sup>a‡</sup>, Victor Fuentes-Cebrian<sup>a‡</sup>, Roberto Boada<sup>a</sup>, Oriol Vallcorba<sup>b</sup>, Montserrat Resina-Gallego<sup>a</sup>, Manuel Valiente<sup>a</sup>, Montserrat López-Mesas<sup>a\*</sup>**

*<sup>a</sup> Centre Grup de Tècniques de Separació en Química (GTS), Departament de Química,  
Universitat Autònoma de Barcelona, Facultat de Ciències. Edifici CN. 08193, Bellaterra,  
Barcelona, Spain*

*<sup>b</sup> ALBA Synchrotron Light Source, Cerdanyola del Valle`s, Barcelona, Spain*

*\* montserrat.lopez.mesas@uab.cat*

*‡ These authors contributed equally to this work*

## SI1: XRD fitting results

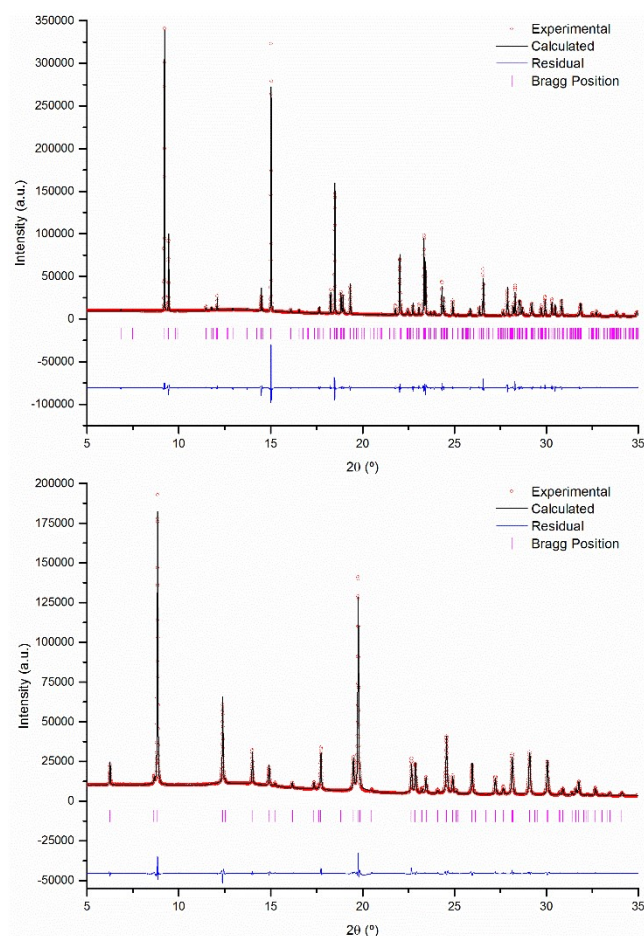

Figure 1. XRD pattern of the synthesized COM (top) and COD (bottom) after the profile matching

Table 2. XRD fitting results of the synthesized calcium oxalate hydrates reported in this work

|                           | COD                             | COM                              |
|---------------------------|---------------------------------|----------------------------------|
|                           | Weddellite                      | Whewellite                       |
| Space group               | <i>I</i> 4/ <i>m</i> , (No. 87) | <i>P</i> 21/ <i>c</i> , No. (14) |
| a (Å)                     | 12.37906(7)                     | 6.29504(4)                       |
| b (Å)                     | 12.37906(7)                     | 14.58911(8)                      |
| c (Å)                     | 7.35282(4)                      | 10.11829(5)                      |
| β (°)                     |                                 | 109.459(5)                       |
| Vol (Å³)                  | 1126.75(2)                      | 876.2(3)                         |
| Wavelength (Å)            | 0.95349                         |                                  |
| Refinement details:       |                                 |                                  |
| 2θ range (°), 2θ step (°) | 3.000 to 40.000, 0.006          |                                  |
| Profile function          | Pseudo Voigt                    |                                  |
| Loren. coef X             | 0.182064                        | 0.105032                         |
| Loren. coef Y             | 0.015621                        | 0.005174                         |
| Gauss coef W              | 0.000471                        | 0.000523                         |
| Zero shift (°)            | -0.01598(8)                     | -0.01547(9)                      |
| R <sub>Bragg</sub>        | 0.0312                          | 0.0698                           |
| R <sub>wp</sub>           | 0.0268                          | 0.0619                           |
| Chi (%)                   | 2.37                            | 5.45                             |

Full-pattern matching performed with DAjust software, see [J. Appl. Cryst. (2012). 45, 844-848]] for details.

## SI2: Examples of azimuthal plot

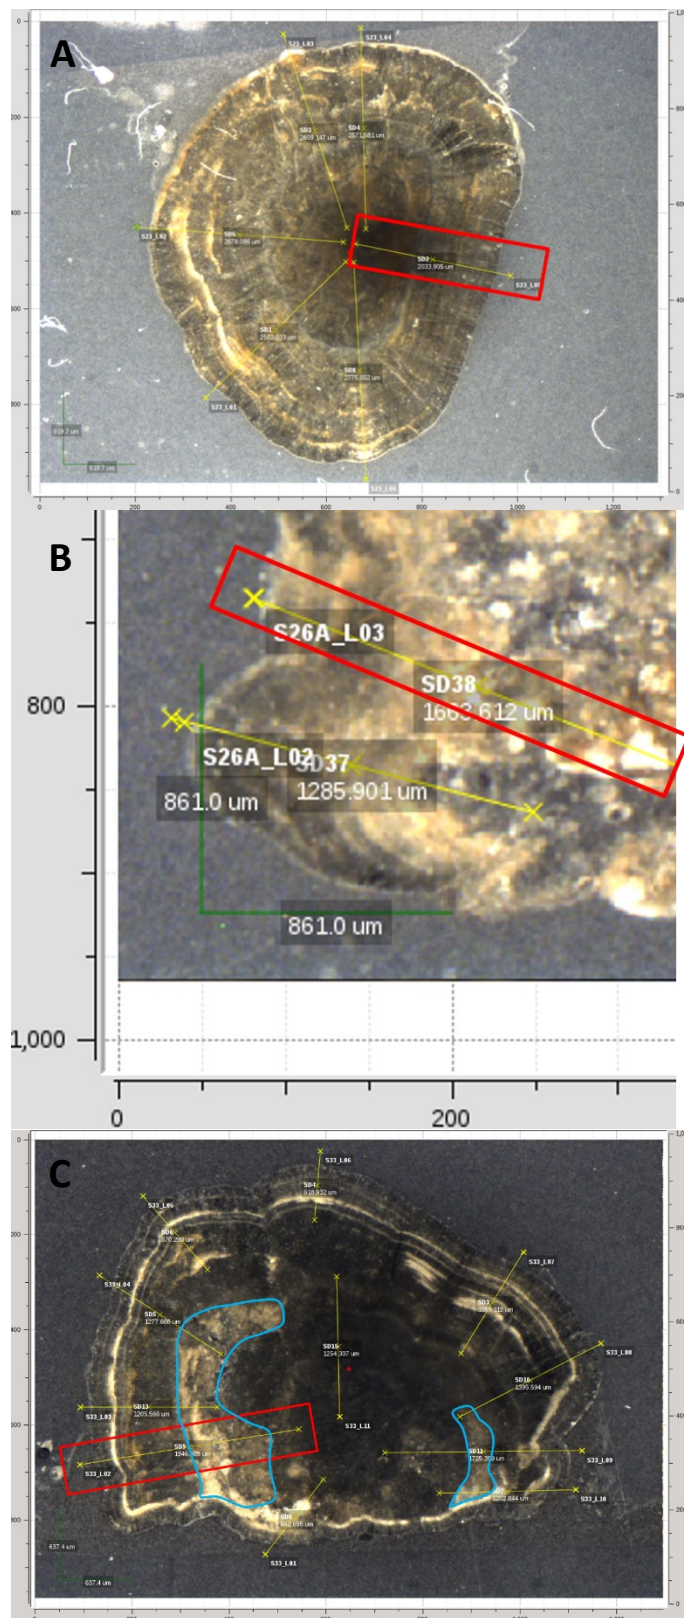

Figure 2. Images of the samples used as examples on the azimuthal Integration section of the manuscript, with the analyzed line highlighted in red. The kidney Stones are, S23 (top), S26A (middle) and S33 (bottom). In the S33, the regions marked in blue represent the ones suspected as TRA, by using the stereomicroscope, due to the differences in texture.

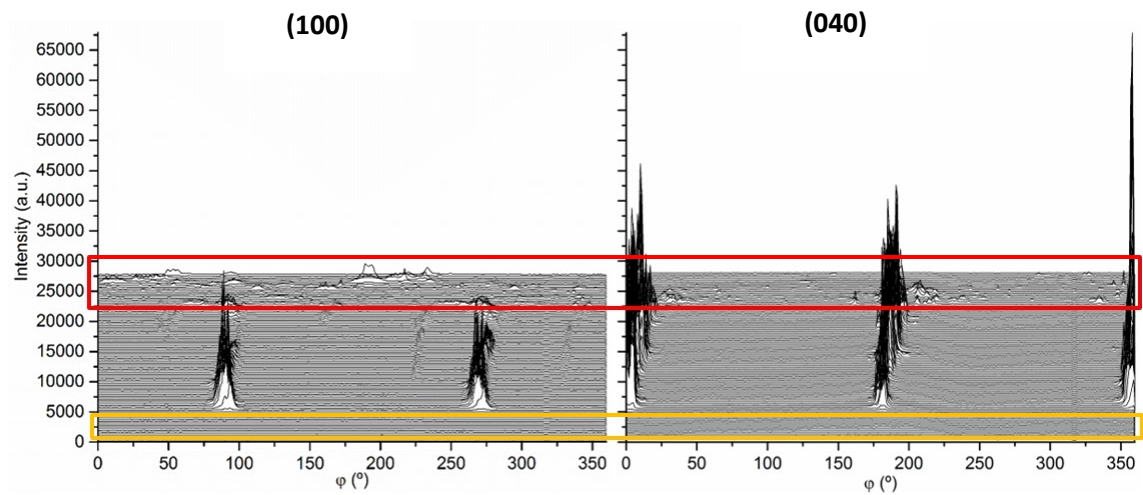

Figure 3. Representation of the azimuthal integration on the reflections (100) (Left) and (040) (Right) of a kidney classified as COM (S32). Orange square (bottom) mark the resin where the Stone is embedded, while red square represents the regions characterized as COM with organic matter. A clear orientation can be observed, since the pattern is repeated every  $180^\circ$  of the azimuthal angle.

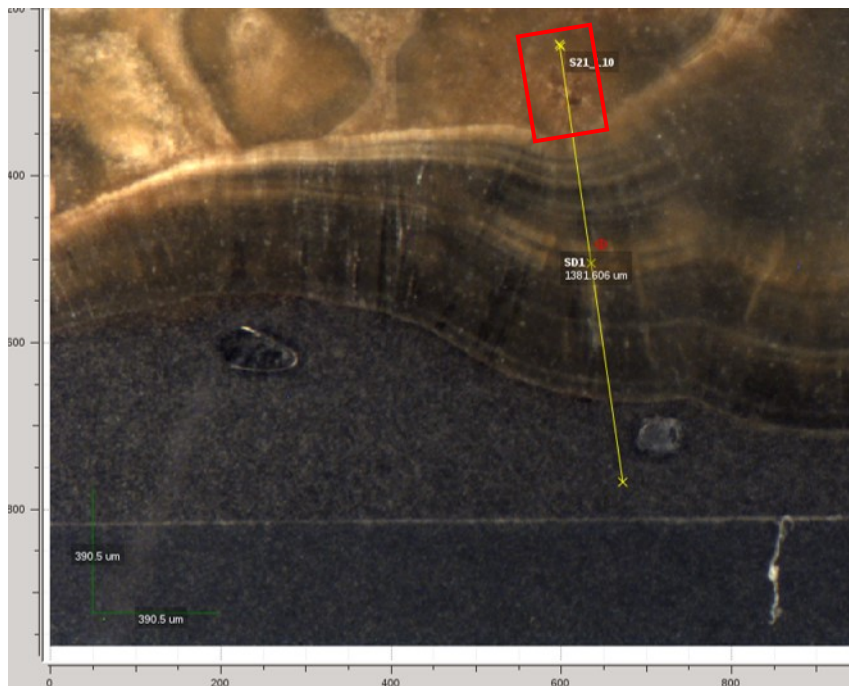

Figure 4. Image of the analyzed line from sample S32 represented in Figure 2. Highlighted in red is the region described as COM with organic matter.

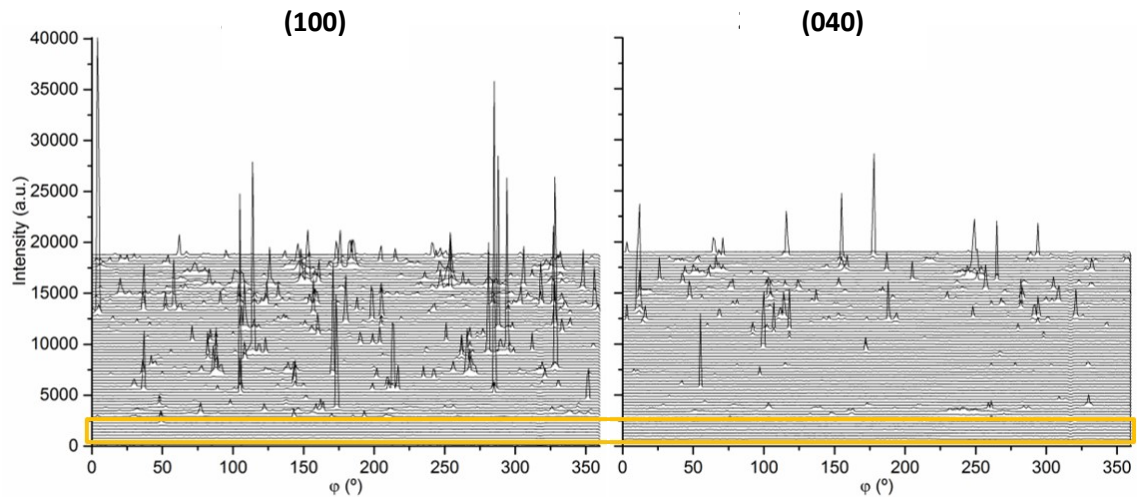

Figure 5. Representation of the azimuthal integration on the reflections (100) (Left) and (040) (Right) of a kidney classified as a transformed COD (S31). Orange square (bottom) mark the resin where the Stone is embedded.

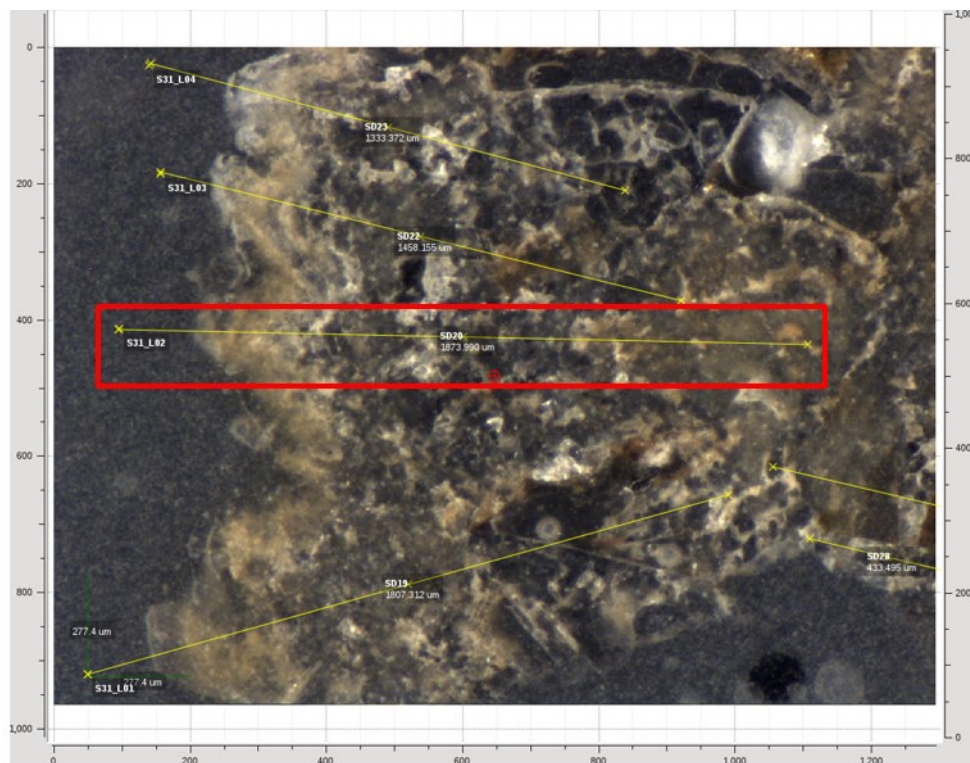

Figure 6. Image of the analyzed line from sample S31 represented in Figure 4, with the analyzed line highlighted in red.

### SI3: Multivariate Curve Resolution Analysis for the Transformation Monitoring

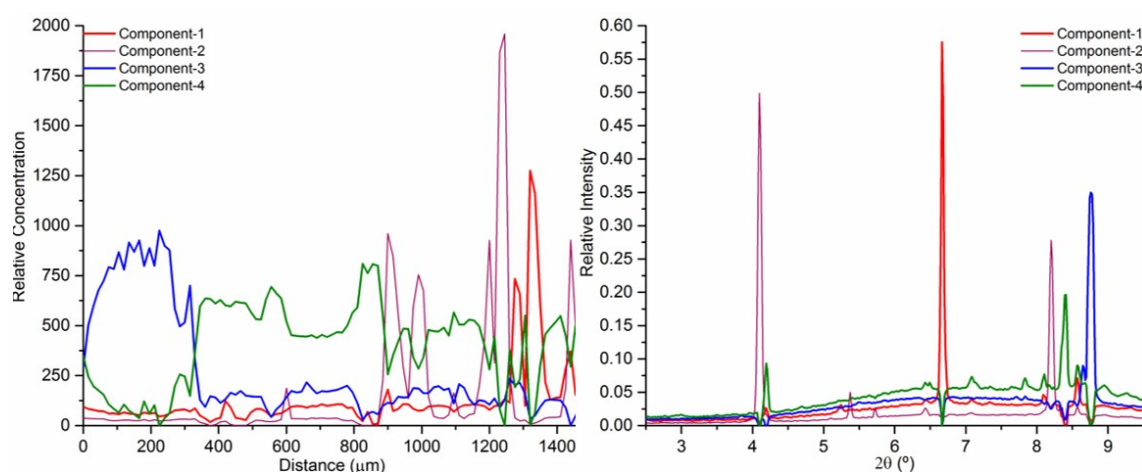

**Figure 7.** Example of MCR analysis of the diffractogram from a Correlated transformation from the superficial deposit of sample S24. In the left panel, the evolution of the four components along the diffraction analysis (from the surface to the inside of the stone) is represented, while on the right panel the simulated patterns for each component is shown.
